# Supplementary material for: N-aryloxide-amidinate group 4 metal complexes
Source: Royal Society of Chemistry journal article supplement (doi:10.1039/d3dt01767b), 2023-01-01
Supplement: d3dt01767b1.pdf [file d3dt01767b1.pdf]

## Supporting Information

### *Manuscript Title:*

N-Aryloxy-Amidinate Group 4 Metal Complexes

### *Authors:*

Hanhua Xu, Ze-jie Lv, Junnian Wei\*, and Zhenfeng Xi

### *Affiliations:*

Beijing National Laboratory for Molecular Sciences (BNLMS), Key Laboratory of Bioorganic Chemistry and Molecular Engineering of Ministry of Education, College of Chemistry, Peking University, Beijing 100871, China.

## Content

|                             |    |
|-----------------------------|----|
| Experimental Methods .....  | 3  |
| X-Ray Crystallography ..... | 5  |
| NMR spectra .....           | 15 |
| IR spectra .....            | 27 |
| References .....            | 32 |

## Experimental Methods

### Scheme S1 Proposed mechanism for the conversion of 2 to 3:

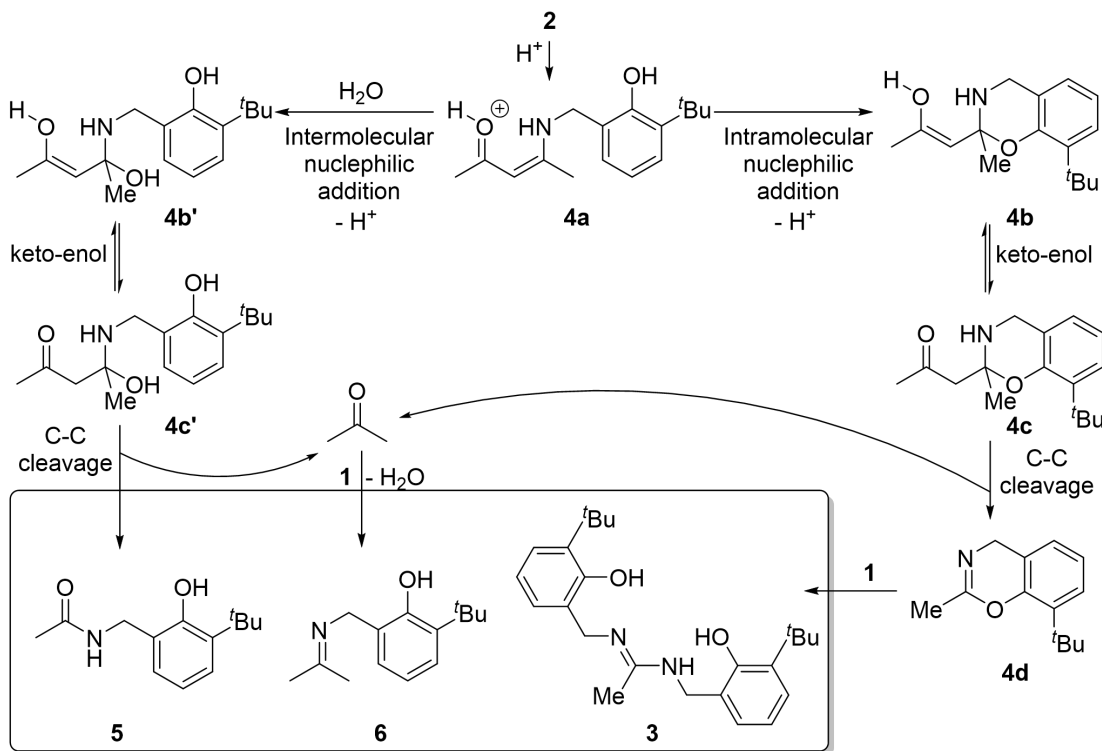

The aryloxy group in compound 2 has nucleophilic character on the oxygen atom, which can attack the activated C=C bond generating the benzoxazine intermediate.<sup>S3, S4</sup> The benzoxazine will react with one equivalent of **1** to produce ligand **3**. However, in preliminary attempts, we could only get a trace amount of ligand **3**. The amide and imide derivatives were main products at almost 1 : 1 ratio. We hypothesized that acetone, the byproduct of C-C bond cleavage, would react with **1** readily to produce imide in the presence of Lewis acid, which inhibited the nucleophilic substitution step. Moreover, H<sub>2</sub>O from the react and condensation of acetone with **1** would also react with the benzoxazine intermediate to produce the amide. After understanding these side reactions, we achieved our goal by adding two equivalents of **1** and strictly drying the implementation of the substrate. A simple mechanistic model is proposed in Scheme S2. Protonation of the carbonyl group by TsOH (p-toluene sulfonic acid) enhances the

electrophilicity of the enamineketone fragment in **2**. Then the intramolecular nucleophilic addition of intermediate **4a** would produce adduct **4b**. Next, C-C bond cleavage would generate the intermediate **4d** in a series of equilibria involving keto-enol tautomerism and prototropy. Finally, the nucleophilic substitution would proceed smoothly to afford ligand **3** in moderate yield. In addition, the intermolecular nucleophilic addition of **4a** with H<sub>2</sub>O would produce an adduct **4b'**. Byproduct **5** would finally be generated along with **6**.

### Scheme S2 Deprotonation of **3**:

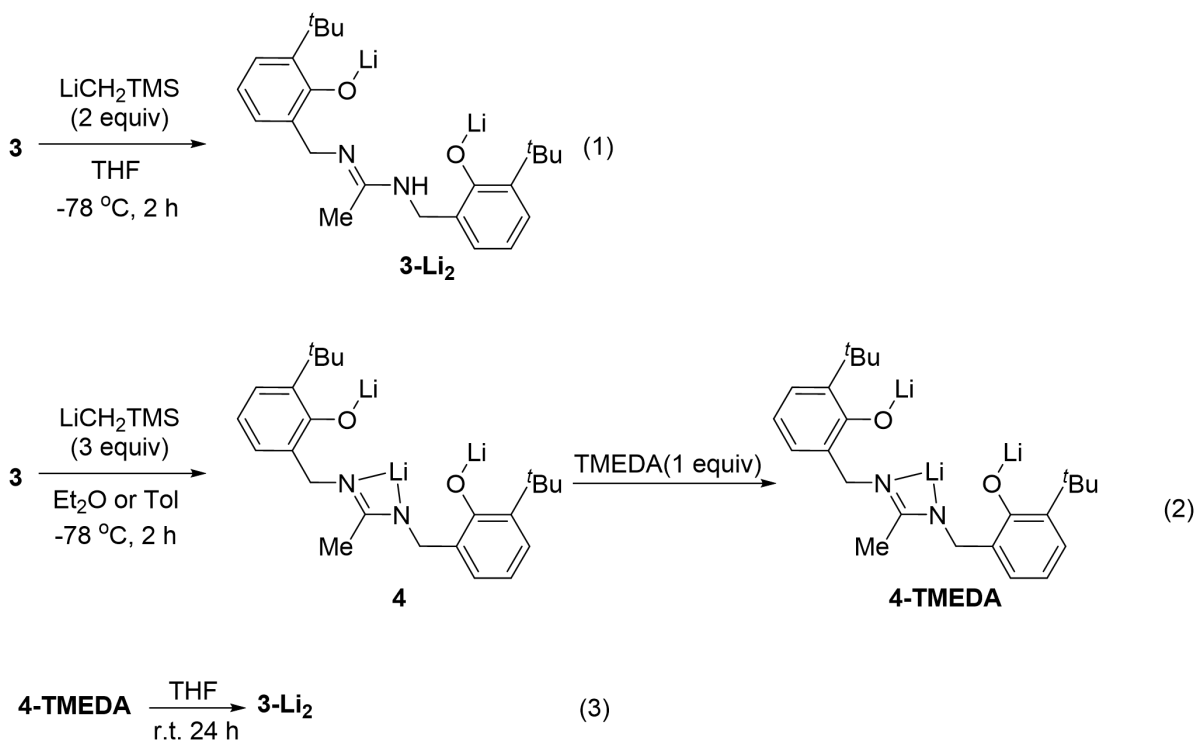

Initial deprotonation of **3** was conducted in THF and only **3-Li<sub>2</sub>** can be observed in <sup>1</sup>H NMR in spite of three or excess equivalents of based added. However, when the solvent is Et<sub>2</sub>O and Tol, the deprotonation reaction went sweetly to afford desired lithium salt, **4**.

**4** was prepared by deprotonation of **3** (191.3 mg, 1.0 equiv, 0.5 mmol) with LiCH<sub>2</sub>TMS (141.3 mg, 3.0 equiv, 1.5 mmol) in Et<sub>2</sub>O and Tol. After stirring in a low temperature (-78 °C) for two hours, the solvent was removed under vacuum to provide a white solid, **4** (> 95 %). The <sup>1</sup>H NMR spectrum of **4** was confused. However, the spectrum of **4-TMEDA**

was identifiable in the presence of 1 equivalent of TMEDA. The crystal of **4-TMEDA** was obtained in Et<sub>2</sub>O at room temperature. <sup>1</sup>H NMR (500 MHz, C<sub>6</sub>D<sub>6</sub>, ppm): δ 1.61 (s, 18H, <sup>t</sup>Bu), 1.89 (br s, 16H, TMEDA), 1.92 (s, 3H, CH<sub>3</sub>), 3.80 (d, *J* = 11 Hz, 2H, CH<sub>2</sub>), 3.36 (d, *J* = 11 Hz, 2H, CH<sub>2</sub>), 6.53 (t, *J* = 15 Hz, 2H, *Ph*), 6.81 (dd, *J* = 7 Hz, *J* = 2 Hz, 2H, *Ph*), 7.30 (dd, *J* = 7 Hz, *J* = 2 Hz, 2H, *Ph*). <sup>13</sup>C NMR (125 MHz, C<sub>6</sub>D<sub>6</sub>): δ 13.2, 31.0, 35.5, 46.4, 51.8, 57.0, 114.5, 126.9, 128.0, 129.5, 138.5, 164.9, 175.7. FT-IR (KBr pellet, cm<sup>-1</sup>): 2953 (s), 2909 (w), 1422 (s), 1226 (s), 870 (s), 746 (s), 682 (s), 620 (s).

### X-Ray Crystallography

**Figure S1.** ORTEP drawing of **4-TMEDA** with 30% thermal ellipsoids. H atoms are omitted for clarity. Selected atom distances (Å) and angles (deg): C1-N1 1.3284(17); C1-N2 1.3286(17); C1-C2 1.5177(17); N1-C1-N2 116.81(11).

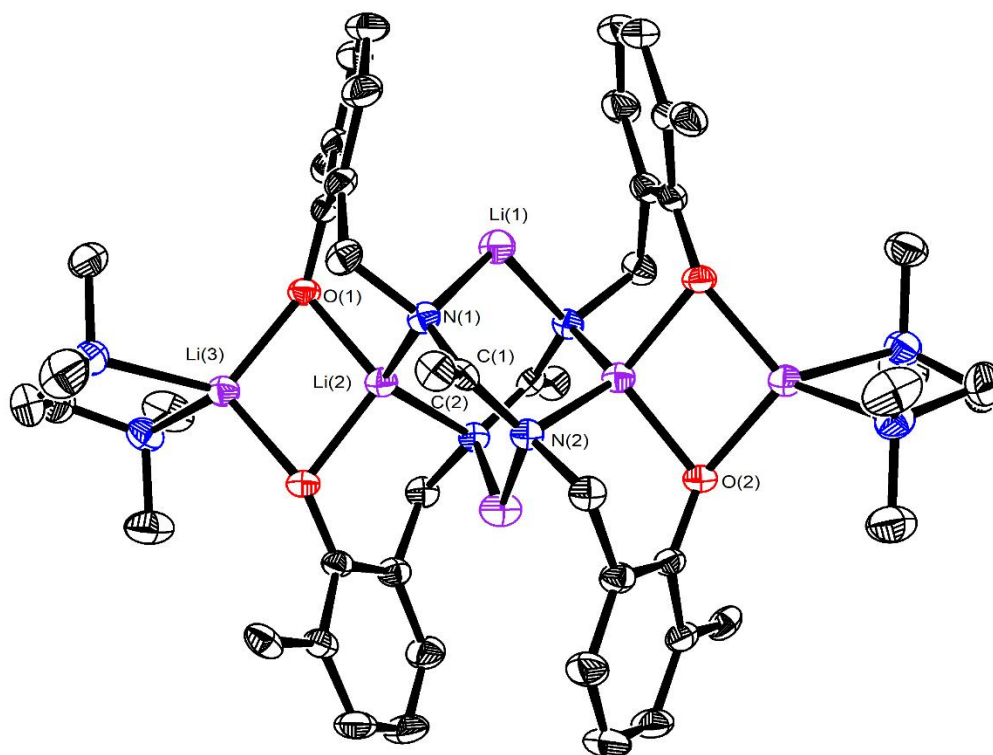

**Table S1.** Crystal data and structure refinement for **4-TMEDA**.

|                                                            | <b>4-TMEDA</b>                                                                |
|------------------------------------------------------------|-------------------------------------------------------------------------------|
| <b>CCDC No.</b>                                            | 2222930                                                                       |
| <b>Formula</b>                                             | C <sub>30</sub> H <sub>47</sub> Li <sub>3</sub> N <sub>4</sub> O <sub>2</sub> |
| <b>Formula weight</b>                                      | 516.53                                                                        |
| <b>Temp. (K)</b>                                           | 180.00(10)                                                                    |
| <b>Crystal system</b>                                      | monoclinic                                                                    |
| <b>Space group</b>                                         | C2/c                                                                          |
| <b><i>a</i> (Å)</b>                                        | 25.2159(6)                                                                    |
| <b><i>b</i> (Å)</b>                                        | 14.3624(4)                                                                    |
| <b><i>c</i> (Å)</b>                                        | 17.5594(4)                                                                    |
| <b><math>\alpha</math>(°)</b>                              | 90                                                                            |
| <b><math>\beta</math>(°)</b>                               | 91.260(2)                                                                     |
| <b><math>\gamma</math>(°)</b>                              | 90                                                                            |
| <b><i>V</i> [Å<sup>3</sup>]</b>                            | 6357.8(3)                                                                     |
| <b><i>Z</i></b>                                            | 8                                                                             |
| <b><math>\rho_{\text{calcd}}</math>(g·cm<sup>-3</sup>)</b> | 1.079                                                                         |
| <b><math>\mu</math>(mm<sup>-1</sup>)</b>                   | 0.066                                                                         |
| <b><i>F</i>(000)</b>                                       | 2240.0                                                                        |
| <b>Collected data</b>                                      | 43781                                                                         |
| <b>Unique data</b>                                         | 7292 [ $R_{\text{int}} = 0.0252$ ]                                            |
| <b>GOF on <i>F</i><sup>2</sup></b>                         | 1.052                                                                         |
| <b>Final <i>R</i> indexes [<i>I</i> &gt; 2σ(<i>I</i>)]</b> | $R_1 = 0.0489$ , $wR_2 = 0.1498$                                              |
| <b><i>R</i> indexes (all data)</b>                         | $R_1 = 0.0571$ , $wR_2 = 0.1554$                                              |
| <b>Completeness</b>                                        | 0.999                                                                         |

**Figure S2.** ORTEP drawing of **5-Ti** with 30% thermal ellipsoids. H atoms, CH<sub>3</sub> groups of the <sup>t</sup>Bu substituents and solvents have been omitted for clarity. Selected atom distances (Å) and angles (deg): C1-N1 1.391(3); C1-N2 1.290(3); C1-C2 1.494(3); Ti1'-N1 2.208(2); Ti1'-N2 2.0692(18); Ti1'-Cl1' 2.3131(7); Ti1'-O2 1.8192(18); Ti1'-O1' 1.8150(15); Ti1'-Ti1 3.3905(8); N1-C1-N2 110.37(19); N1'-Ti1'-Cl1' 164.32(5).

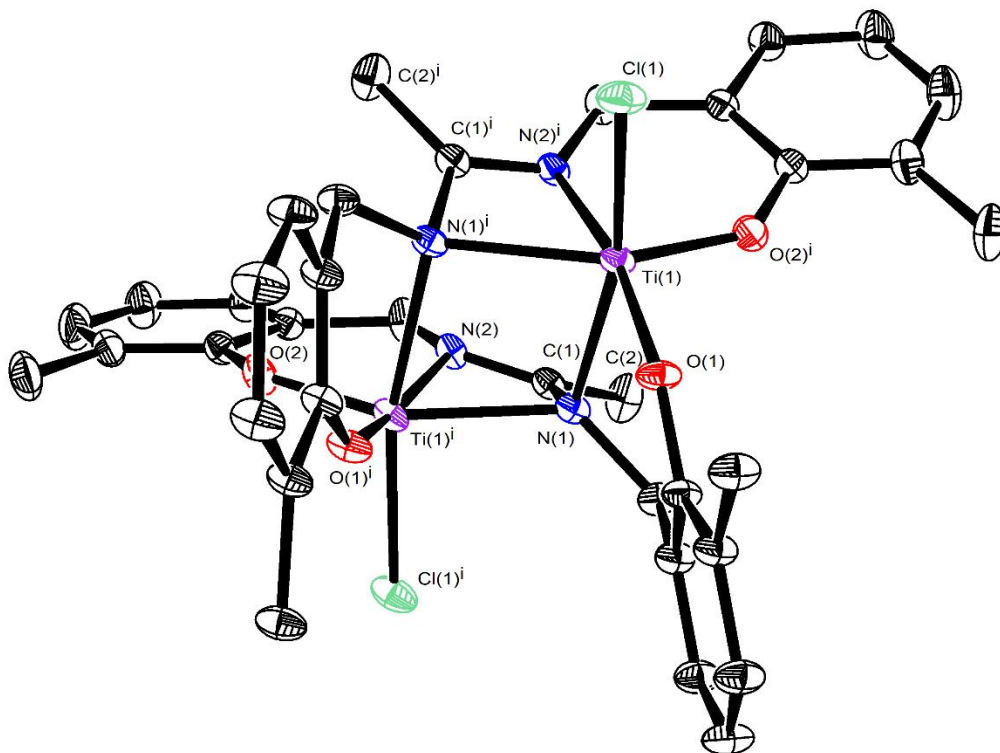

**Table S2.** Crystal data and structure refinement for **5-Ti**.

|                                                            | <b>5-Ti</b>                                                                                   |
|------------------------------------------------------------|-----------------------------------------------------------------------------------------------|
| <b>CCDC No.</b>                                            | 2222254                                                                                       |
| <b>Formula</b>                                             | C <sub>55</sub> H <sub>73</sub> Cl <sub>2</sub> N <sub>4</sub> O <sub>5</sub> Ti <sub>2</sub> |
| <b>Formula weight</b>                                      | 1036.87                                                                                       |
| <b>Temp. (K)</b>                                           | 180.00(10)                                                                                    |
| <b>Crystal system</b>                                      | orthorhombic                                                                                  |
| <b>Space group</b>                                         | Pcca                                                                                          |
| <b><i>a</i> (Å)</b>                                        | 27.7408(8)                                                                                    |
| <b><i>b</i> (Å)</b>                                        | 16.6115(4)                                                                                    |
| <b><i>c</i> (Å)</b>                                        | 24.3585(7)                                                                                    |
| <b><math>\alpha</math>(°)</b>                              | 90                                                                                            |
| <b><math>\beta</math>(°)</b>                               | 90                                                                                            |
| <b><math>\gamma</math>(°)</b>                              | 90                                                                                            |
| <b><i>V</i> [Å<sup>3</sup>]</b>                            | 11224.8(5)                                                                                    |
| <b><i>Z</i></b>                                            | 8                                                                                             |
| <b><math>\rho_{\text{calcd}}</math>(g·cm<sup>-3</sup>)</b> | 1.227                                                                                         |
| <b><math>\mu</math>(mm<sup>-1</sup>)</b>                   | 0.427                                                                                         |
| <b><i>F</i>(000)</b>                                       | 4392.0                                                                                        |
| <b>Collected data</b>                                      | 49340                                                                                         |
| <b>Unique data</b>                                         | 12844 [R <sub>int</sub> = 0.0289]                                                             |
| <b>GOF on <i>F</i><sup>2</sup></b>                         | 1.025                                                                                         |
| <b>Final <i>R</i> indexes [<i>I</i> &gt; 2σ(<i>I</i>)]</b> | R <sub>1</sub> = 0.0525, wR <sub>2</sub> = 0.1506                                             |
| <b><i>R</i> indexes (all data)</b>                         | R <sub>1</sub> = 0.0662, wR <sub>2</sub> = 0.1588                                             |
| <b>Completeness</b>                                        | 0.997                                                                                         |



**Figure S3.** ORTEP drawing of **5-Zr** with 30% thermal ellipsoids. H atoms, CH<sub>3</sub> groups of the <sup>t</sup>Bu substituents and solvents have been omitted for clarity. Selected atom distances (Å) and angles (deg): C1-N1 1.336(2); C1-N2 1.337(2); C1-C2 1.489(2); Zr1-N1 2.3887(12); Zr1-N2 2.3200(12); Zr1-C11 2.4689(4); Zr1-O1 1.970(1); Zr1-O2 1.9711(10); Zr1-Zr1' 3.2231(3); O1-Zr1-O2 103.01(5).

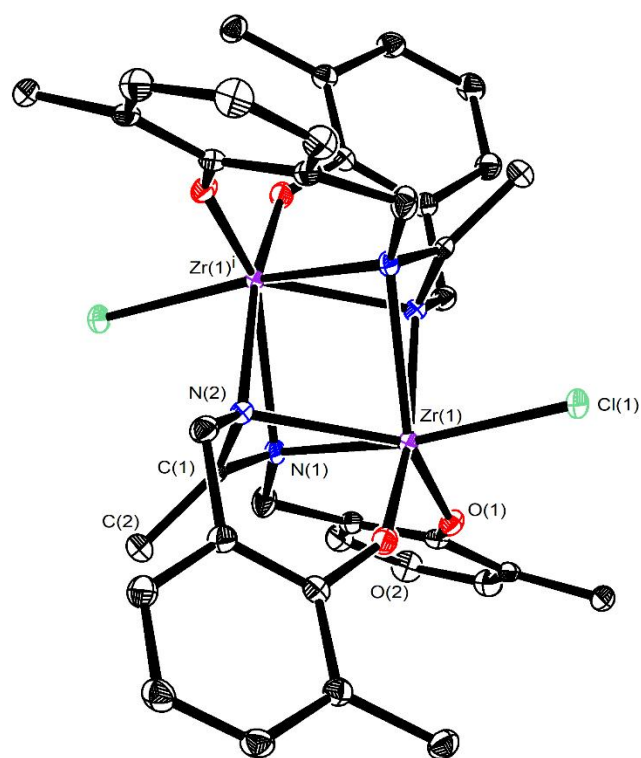

**Table S3.** Crystal data and structure refinement for **5-Zr**.

|                                                            | <b>5-Zr</b>                                                                                   |
|------------------------------------------------------------|-----------------------------------------------------------------------------------------------|
| <b>CCDC No.</b>                                            | 2222931                                                                                       |
| <b>Formula</b>                                             | C <sub>48</sub> H <sub>62</sub> Cl <sub>2</sub> N <sub>4</sub> O <sub>4</sub> Zr <sub>2</sub> |
| <b>Formula weight</b>                                      | 1012.35                                                                                       |
| <b>Temp. (K)</b>                                           | 179.99(10)                                                                                    |
| <b>Crystal system</b>                                      | triclinic                                                                                     |
| <b>Space group</b>                                         | P-1                                                                                           |
| <b><i>a</i> (Å)</b>                                        | 12.3616(3)                                                                                    |
| <b><i>b</i> (Å)</b>                                        | 13.1320(3)                                                                                    |
| <b><i>c</i> (Å)</b>                                        | 16.7306(4)                                                                                    |
| <b><math>\alpha</math>(°)</b>                              | 101.875(2)                                                                                    |
| <b><math>\beta</math>(°)</b>                               | 109.119(2)                                                                                    |
| <b><math>\gamma</math>(°)</b>                              | 104.700(2)                                                                                    |
| <b><i>V</i> [Å<sup>3</sup>]</b>                            | 2354.84(10)                                                                                   |
| <b><i>Z</i></b>                                            | 2                                                                                             |
| <b><math>\rho_{\text{calcd}}</math>(g·cm<sup>-3</sup>)</b> | 1.428                                                                                         |
| <b><math>\mu</math>(mm<sup>-1</sup>)</b>                   | 0.603                                                                                         |
| <b><i>F</i>(000)</b>                                       | 1048.0                                                                                        |
| <b>Collected data</b>                                      | 41430                                                                                         |
| <b>Unique data</b>                                         | 10762 [ <i>R</i> <sub>int</sub> = 0.0281]                                                     |
| <b>GOF on <i>F</i><sup>2</sup></b>                         | 1.063                                                                                         |
| <b>Final <i>R</i> indexes [<i>I</i> &gt; 2σ(<i>I</i>)]</b> | <i>R</i> <sub>1</sub> = 0.0240, w <i>R</i> <sub>2</sub> = 0.0638                              |
| <b><i>R</i> indexes (all data)</b>                         | <i>R</i> <sub>1</sub> = 0.0273, w <i>R</i> <sub>2</sub> = 0.0649                              |
| <b>Completeness</b>                                        | 0.998                                                                                         |

**Figure S4.** ORTEP drawing of **5-Hf** with 30% thermal ellipsoids. H atoms, CH<sub>3</sub> groups of the <sup>t</sup>Bu substituents and solvents have been omitted for clarity. Selected atom distances (Å) and angles (deg): C1-N1 1.385(4); C1-N2 1.2984(2); C1-C2 1.497(4); Hf1-N1 2.340(2); Hf1-N2 2.224(2); Hf1-Cl1 2.4489(7); Hf1-O1 1.952(2); Hf1-O2 1.9515(19); Hf1-Hf1' 3.4620(2); O1-Hf1-O2 104.64(9).

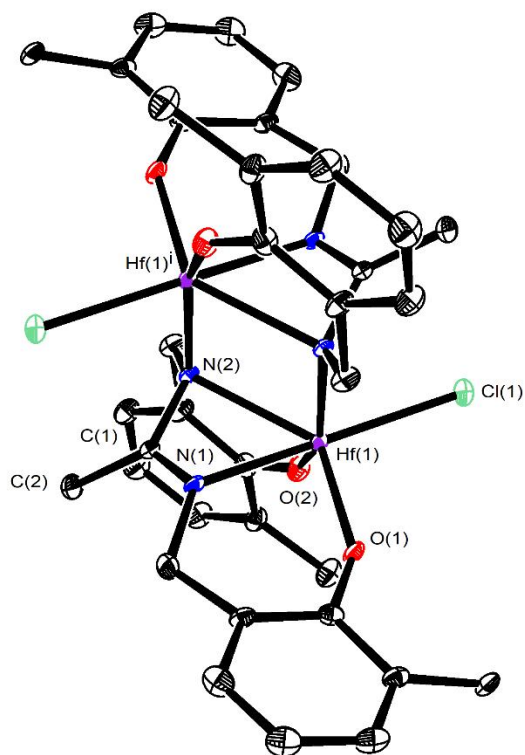

**Table S4.** Crystal data and structure refinement for **5-Hf**.

|                                                            | <b>5-Hf</b>                                                                                   |
|------------------------------------------------------------|-----------------------------------------------------------------------------------------------|
| <b>CCDC No.</b>                                            | 2222935                                                                                       |
| <b>Formula</b>                                             | C <sub>48</sub> H <sub>62</sub> Cl <sub>2</sub> Hf <sub>2</sub> N <sub>4</sub> O <sub>4</sub> |
| <b>Formula weight</b>                                      | 1186.89                                                                                       |
| <b>Temp. (K)</b>                                           | 180.00(10)                                                                                    |
| <b>Crystal system</b>                                      | triclinic                                                                                     |
| <b>Space group</b>                                         | P-1                                                                                           |
| <b><i>a</i> (Å)</b>                                        | 12.2507(2)                                                                                    |
| <b><i>b</i> (Å)</b>                                        | 13.1833(2)                                                                                    |
| <b><i>c</i> (Å)</b>                                        | 16.8154(2)                                                                                    |
| <b><math>\alpha</math>(°)</b>                              | 100.1710(10)                                                                                  |
| <b><math>\beta</math>(°)</b>                               | 109.6060(10)                                                                                  |
| <b><math>\gamma</math>(°)</b>                              | 103.6480(10)                                                                                  |
| <b><i>V</i> [Å<sup>3</sup>]</b>                            | 2387.07(6)                                                                                    |
| <b><i>Z</i></b>                                            | 2                                                                                             |
| <b><math>\rho_{\text{calcd}}</math>(g·cm<sup>-3</sup>)</b> | 1.651                                                                                         |
| <b><math>\mu</math>(mm<sup>-1</sup>)</b>                   | 4.504                                                                                         |
| <b><i>F</i>(000)</b>                                       | 1176.0                                                                                        |
| <b>Collected data</b>                                      | 62891                                                                                         |
| <b>Unique data</b>                                         | 10906 [R <sub>int</sub> = 0.0742]                                                             |
| <b>GOF on <i>F</i><sup>2</sup></b>                         | 1.025                                                                                         |
| <b>Final <i>R</i> indexes [I &gt; 2σ(I)]</b>               | R <sub>1</sub> = 0.0296, wR <sub>2</sub> = 0.0711                                             |
| <b><i>R</i> indexes (all data)</b>                         | R <sub>1</sub> = 0.0325, wR <sub>2</sub> = 0.0724                                             |
| <b>Completeness</b>                                        | 0.999                                                                                         |

**Figure S5** ORTEP drawing of **6** with 30% thermal ellipsoids. Hydrogen atoms, lithium and solvents have been omitted for clarity. Selected atom distances (Å) and angles (deg): C1-N1 1.335(4); C1-N2 1.337(4); Hf1-N1 2.219(3); Hf1-N3 2.236(3); Hf1-N6 2.255(3); Hf2-N2 2.223(3); Hf2-N3 2.245(3); Hf2-N6 2.259(3); Hf1-O1 1.939(2); Hf2-O2 1.945(2); Hf1-Cl1 2.425(18); Hf1-Cl2 2.4153(8); Hf2-Cl3 2.4203(9); Hf2-Cl4 2.4022(9); N3-N4 1.221(4); N4-N5 1.127(4); N6-N7 1.225(4); N7-N8 1.130(4); Hf1-Hf2 3.57762(19); N1-C1-N2 120.5(3); Hf1-N3-Hf2 104.82(10); Hf1-N6-Hf2 105.95(11).

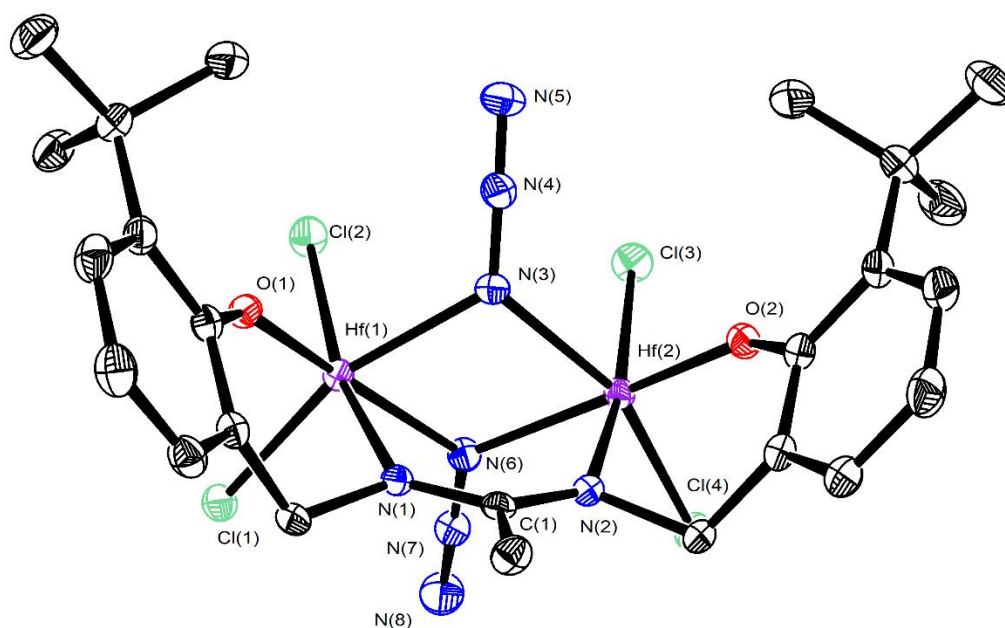

**Table S5.** Crystal data and structure refinement for **6**.

|                                                            | <b>6</b>                                                                                        |
|------------------------------------------------------------|-------------------------------------------------------------------------------------------------|
| <b>CCDC No.</b>                                            | 2249134                                                                                         |
| <b>Formula</b>                                             | C <sub>40</sub> H <sub>62</sub> Cl <sub>4</sub> Hf <sub>2</sub> LiN <sub>8</sub> O <sub>6</sub> |
| <b>Formula weight</b>                                      | 1256.709                                                                                        |
| <b>Temp. (K)</b>                                           | 179.99(10)                                                                                      |
| <b>Crystal system</b>                                      | triclinic                                                                                       |
| <b>Space group</b>                                         | P-1                                                                                             |
| <b><i>a</i> (Å)</b>                                        | 12.5852(2)                                                                                      |
| <b><i>b</i> (Å)</b>                                        | 12.8869(2)                                                                                      |
| <b><i>c</i> (Å)</b>                                        | 17.0743(2)                                                                                      |
| <b><math>\alpha</math>(°)</b>                              | 89.129(1)                                                                                       |
| <b><math>\beta</math>(°)</b>                               | 71.984(1)                                                                                       |
| <b><math>\gamma</math>(°)</b>                              | 72.209(1)                                                                                       |
| <b><i>V</i> [Å<sup>3</sup>]</b>                            | 2497.84(7)                                                                                      |
| <b><i>Z</i></b>                                            | 2                                                                                               |
| <b><math>\rho_{\text{calcd}}</math>(g·cm<sup>-3</sup>)</b> | 1.671                                                                                           |
| <b><math>\mu</math>(mm<sup>-1</sup>)</b>                   | 4.417                                                                                           |
| <b><i>F</i>(000)</b>                                       | 1243.1                                                                                          |
| <b>Collected data</b>                                      | 60063                                                                                           |
| <b>Unique data</b>                                         | 9843 [R <sub>int</sub> = 0.0522]                                                                |
| <b>GOF on <i>F</i><sup>2</sup></b>                         | 1.052                                                                                           |
| <b>Final <i>R</i> indexes [<i>I</i> &gt; 2σ(<i>I</i>)]</b> | R <sub>1</sub> = 0.0231, wR <sub>2</sub> = 0.0538                                               |
| <b><i>R</i> indexes (all data)</b>                         | R <sub>1</sub> = 0.0281, wR <sub>2</sub> = 0.0568                                               |
| <b>Completeness</b>                                        | 1                                                                                               |

## NMR spectra

Figure S6.  $^1\text{H}$  NMR spectrum of **1** in  $\text{CDCl}_3$ .

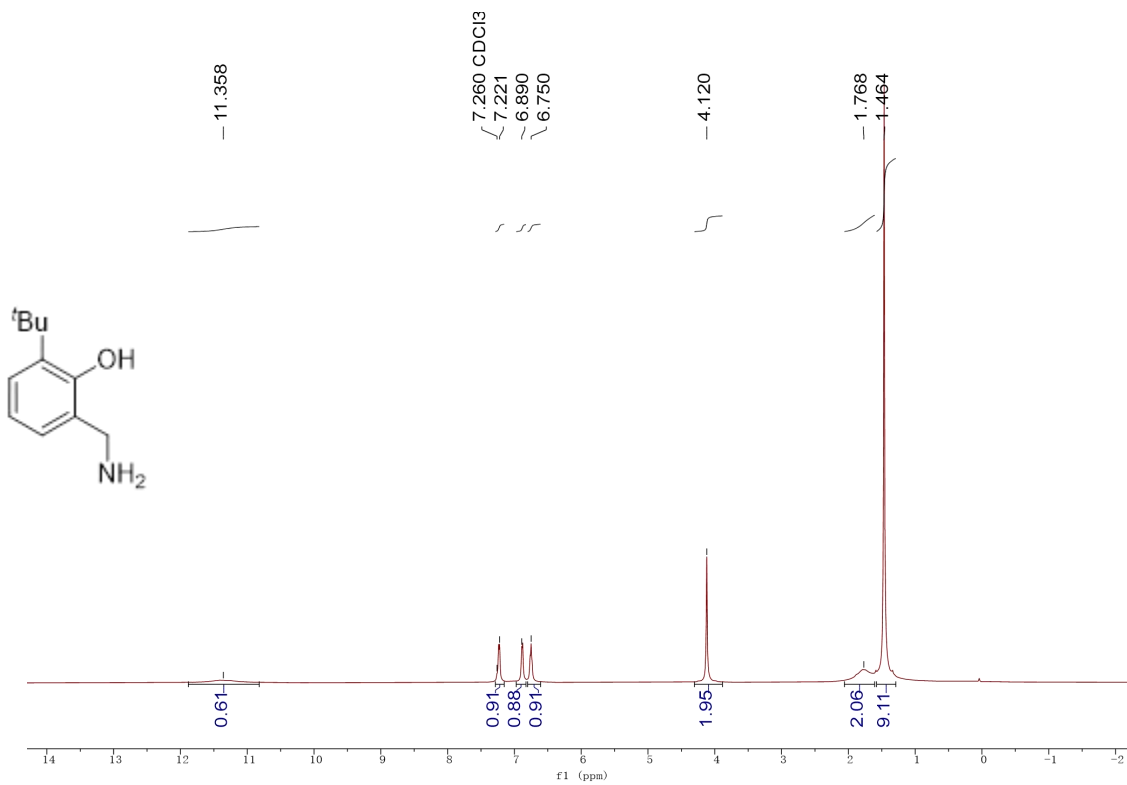

Figure S7.  $^{13}\text{C}$  NMR spectrum of **1** in  $\text{CDCl}_3$ .

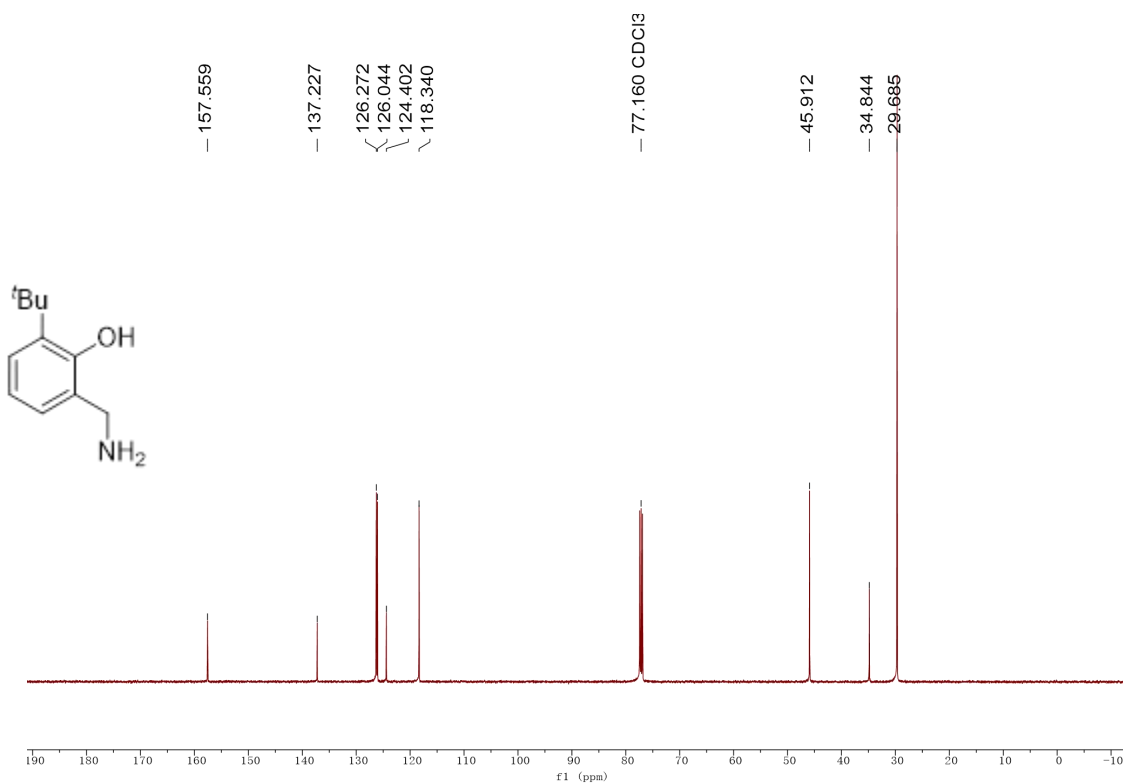

Figure S8.  $^1\text{H}$  NMR spectrum of **2** in  $\text{CDCl}_3$ .

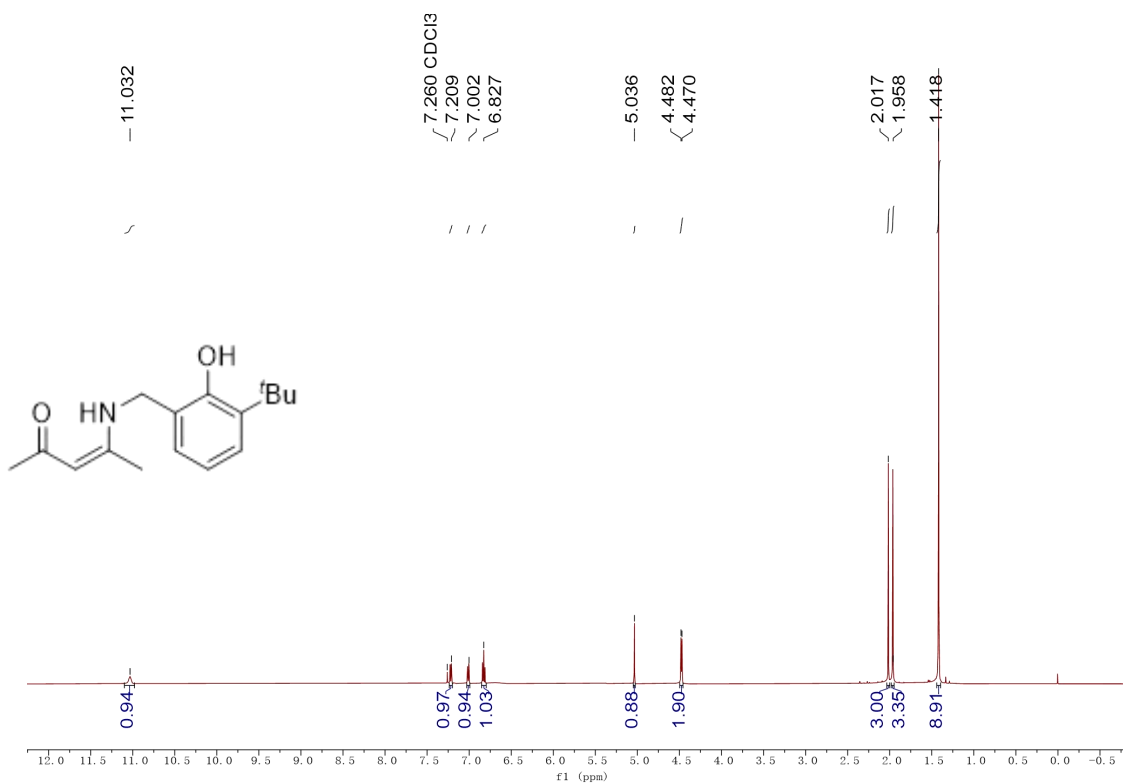



**Figure S9.**  $^{13}\text{C}$  NMR spectrum of **2** in  $\text{CDCl}_3$ .

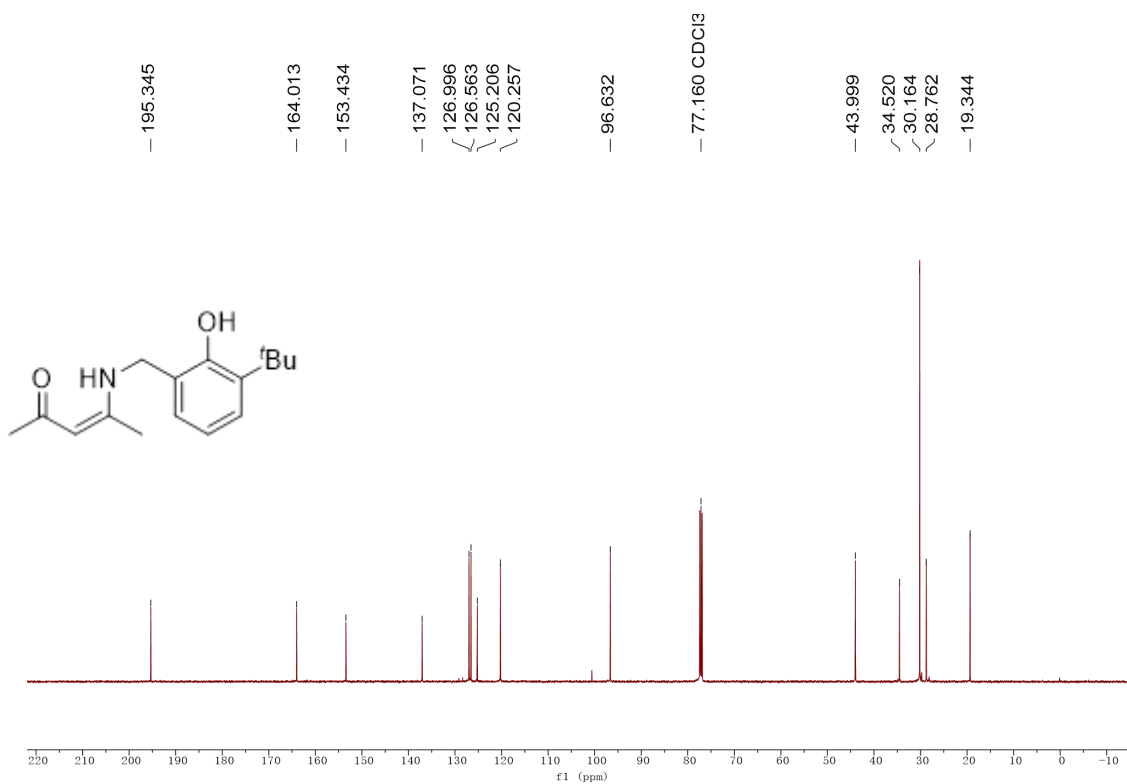

**Figure S10.**  $^1\text{H}$  NMR spectrum of ligand **3** in  $\text{DMSO-}d_6$ .

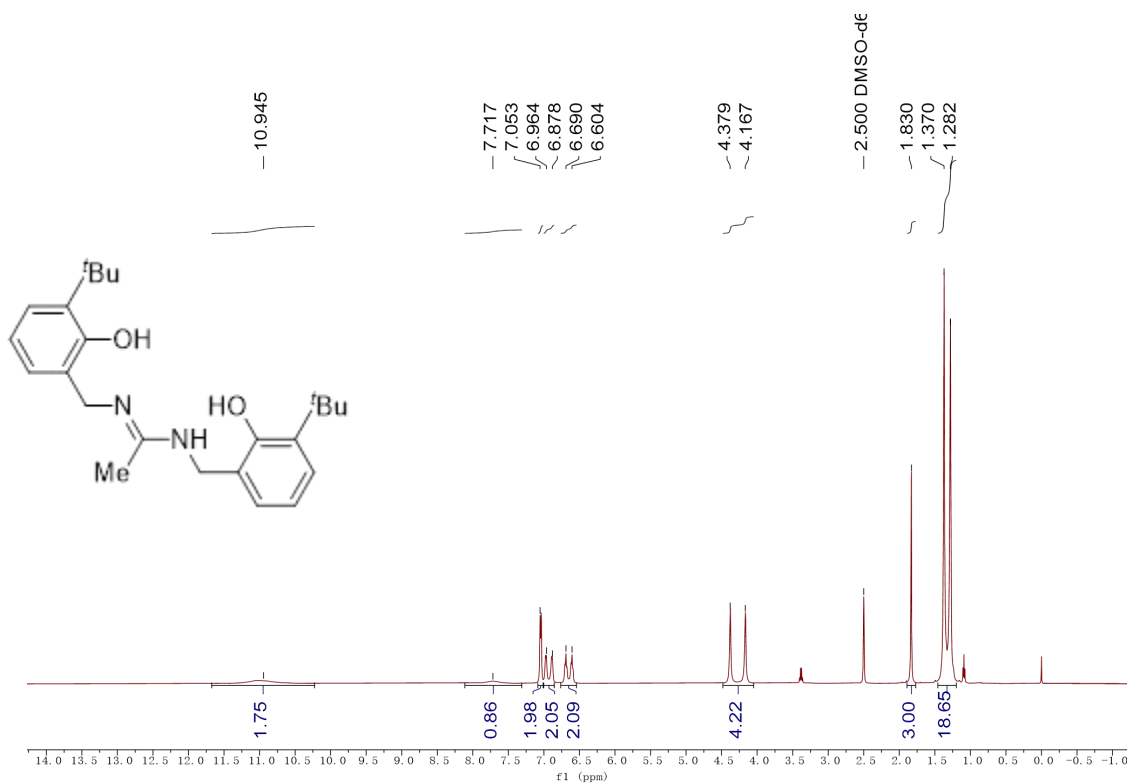

**Figure S11.**  $^{13}\text{C}$  NMR spectrum of ligand **3** in  $\text{DMSO-d}_6$ .

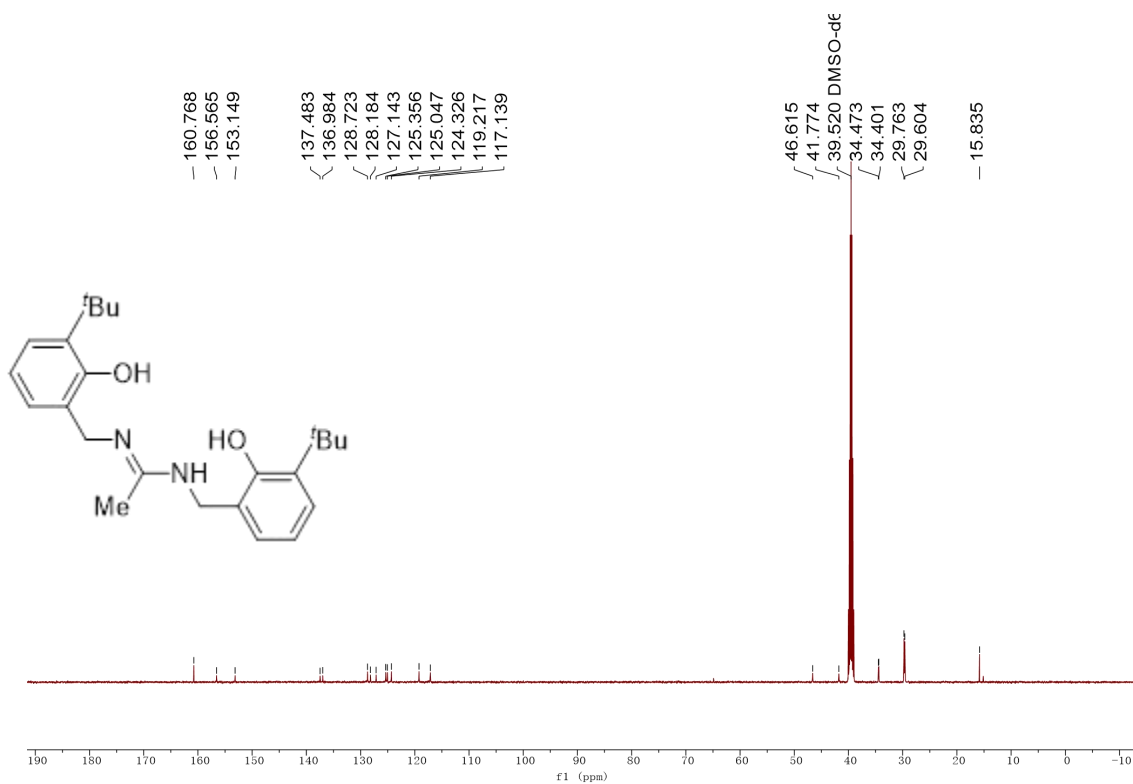

**Figure S12.**  $^1\text{H}$  NMR spectrum of complex **4-TMEDA** in  $\text{C}_6\text{D}_6$ .

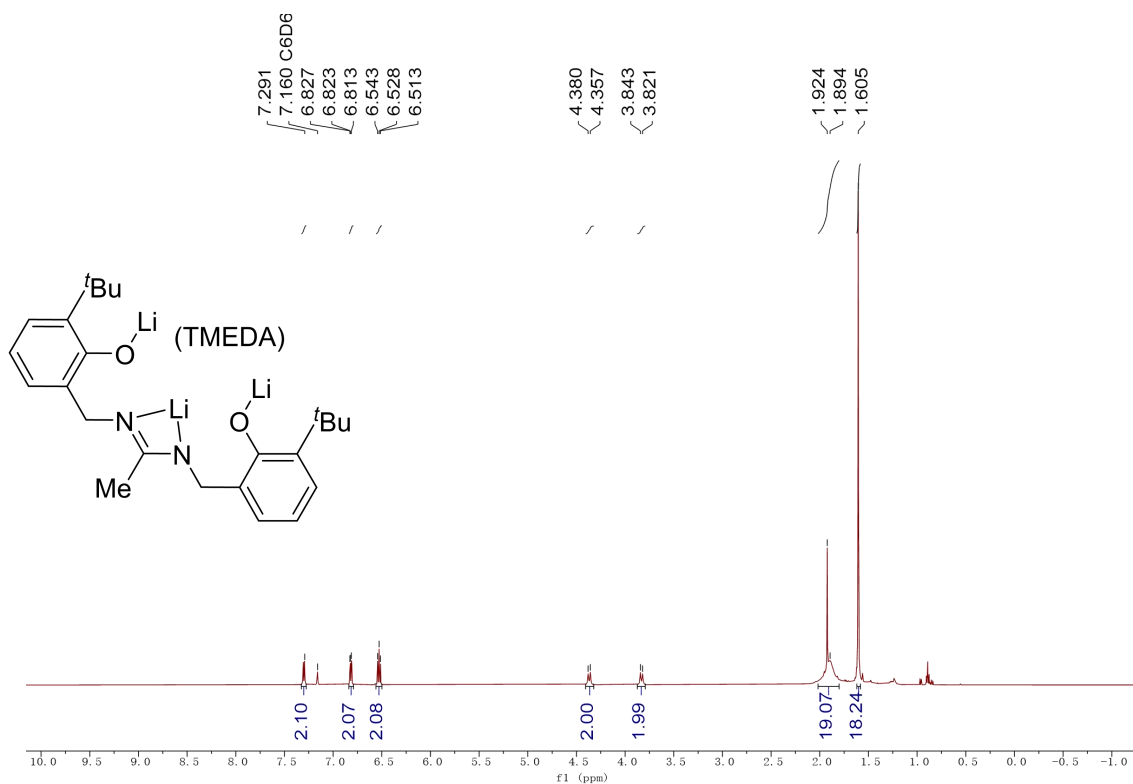

Figure S13.  $^{13}\text{C}$  NMR spectrum of complex 4-TMEDA in  $\text{C}_6\text{D}_6$ .

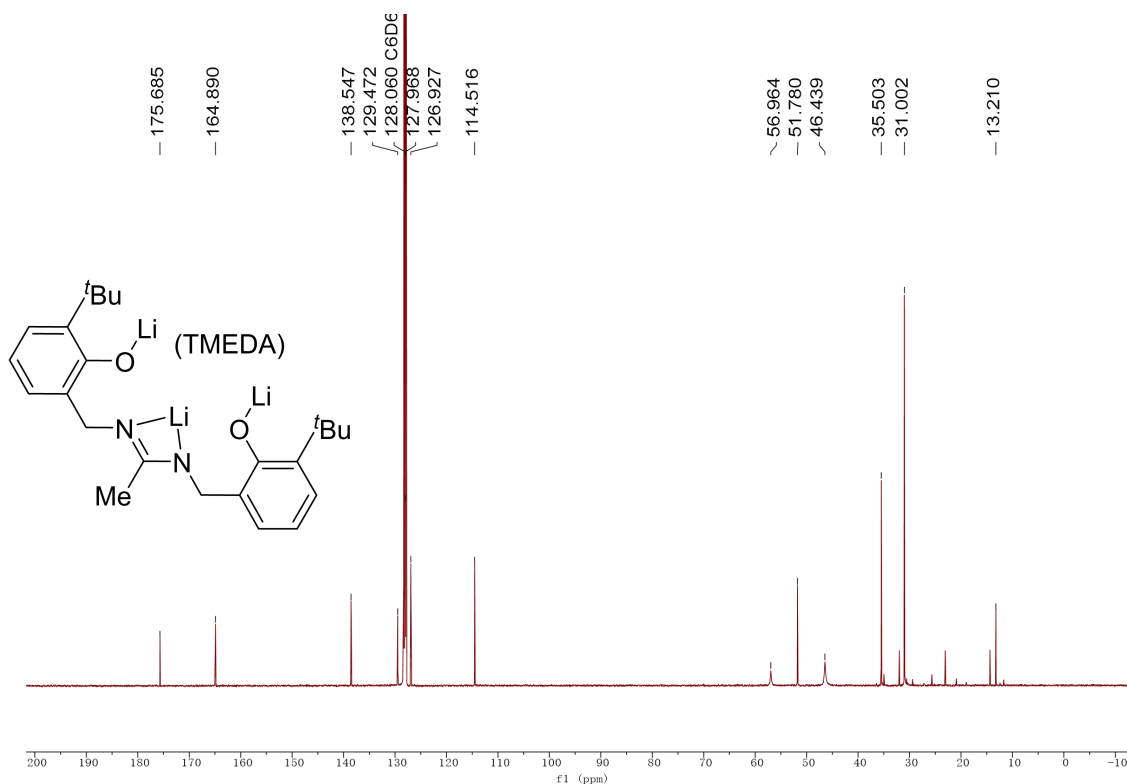

Figure S14.  $^1\text{H}$  NMR spectrum of complex 3- $\text{Li}_2$  in  $\text{THF-d}_8$ .

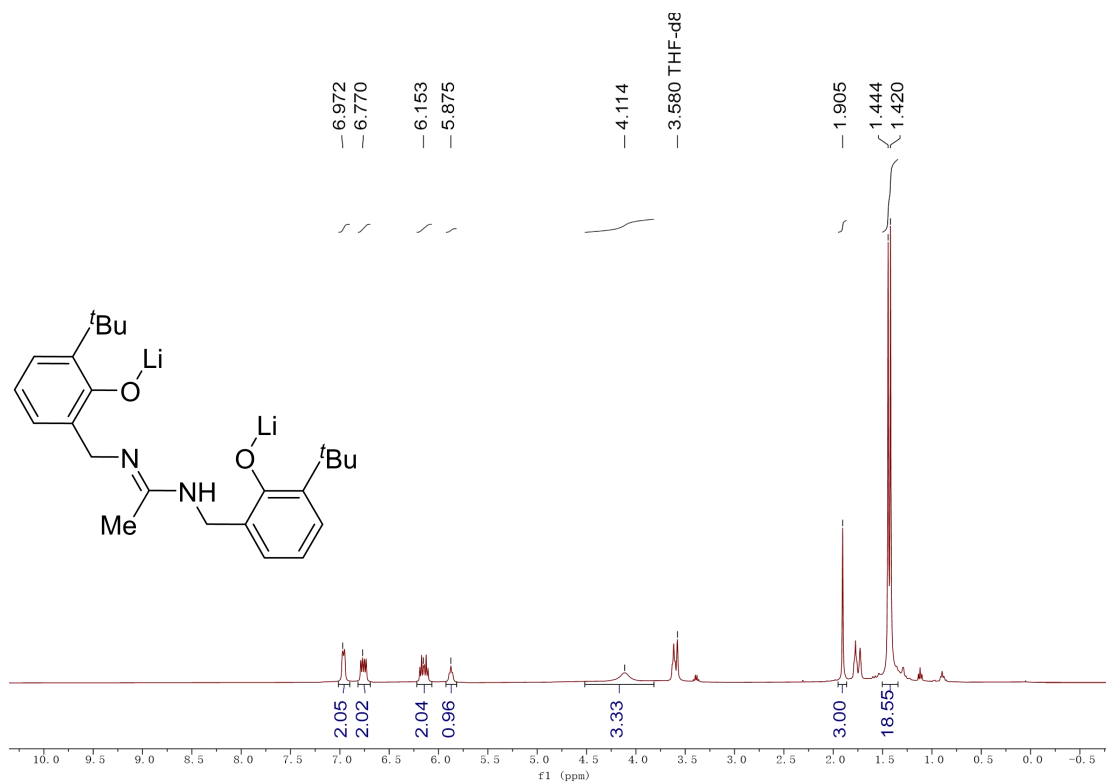

**Figure S15.**  $^1\text{H}$  NMR spectrum of complex **4** to **3-Li<sub>2</sub>** in THF- $d_8$ .

(Half of **4** transformed to **3-Li<sub>2</sub>** after 12 h)

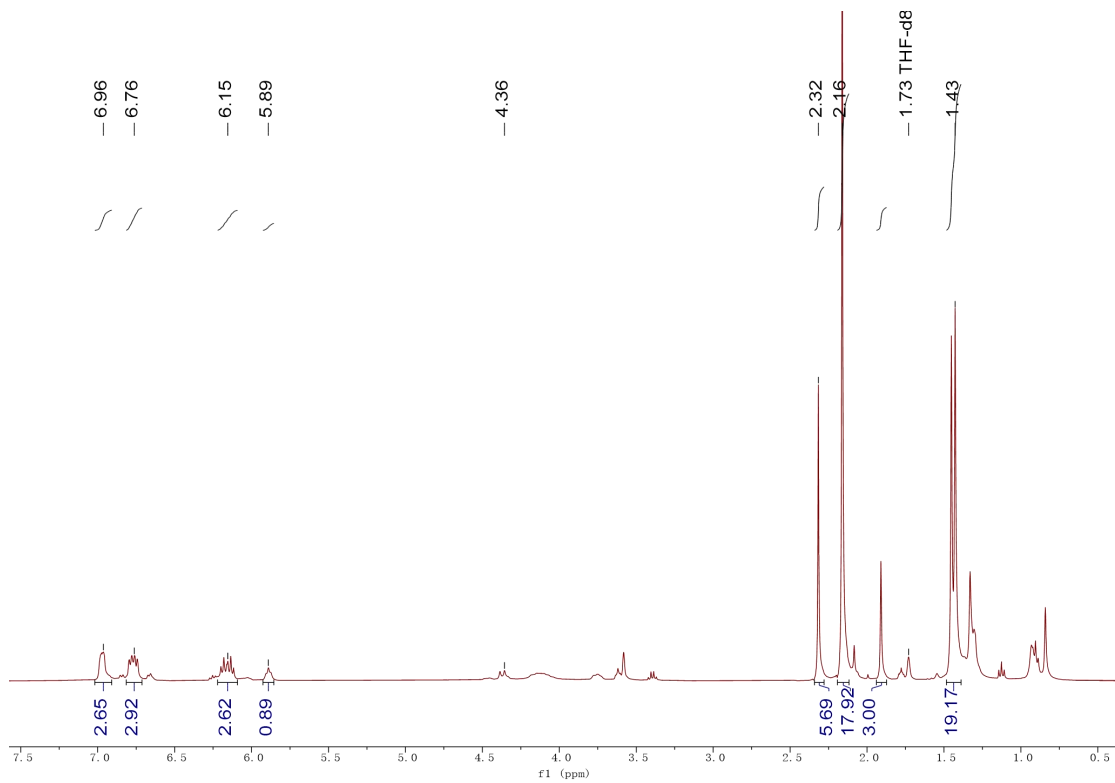

Figure S16.  $^1\text{H}$  NMR spectrum of complex **5-Ti** in  $\text{C}_6\text{D}_6$ .

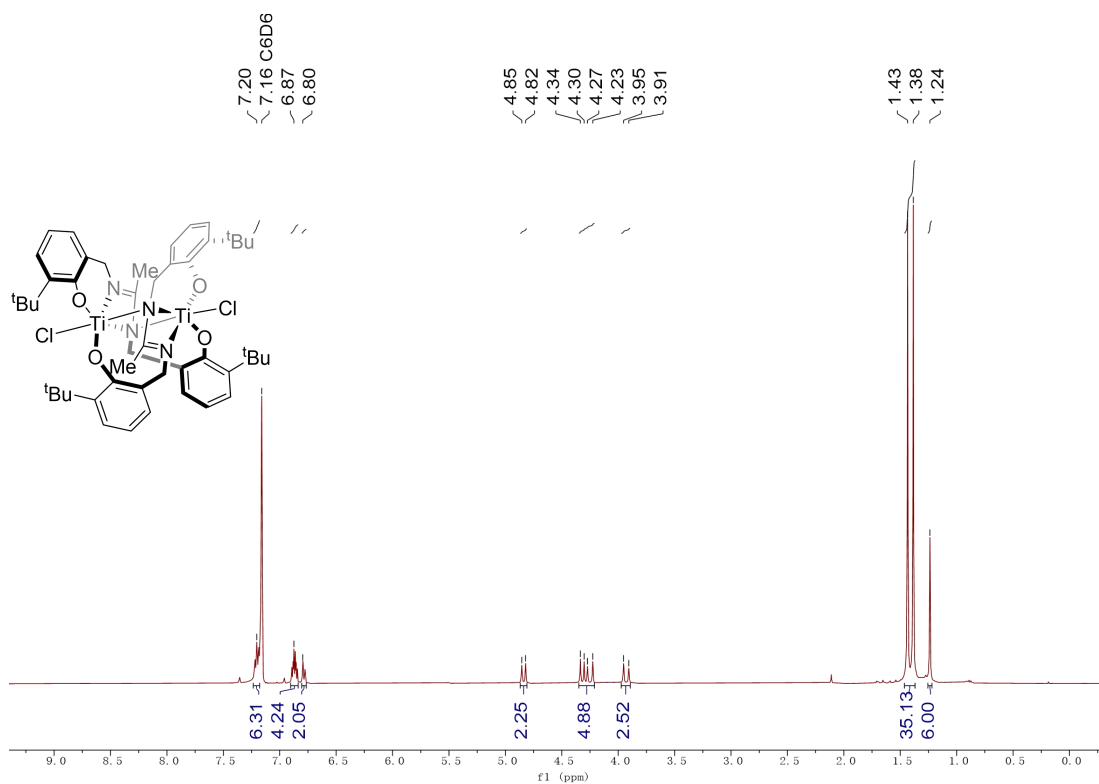

Figure S17.  $^{13}\text{C}$  NMR spectrum of complex **5-Ti** in  $\text{C}_6\text{D}_6$ .

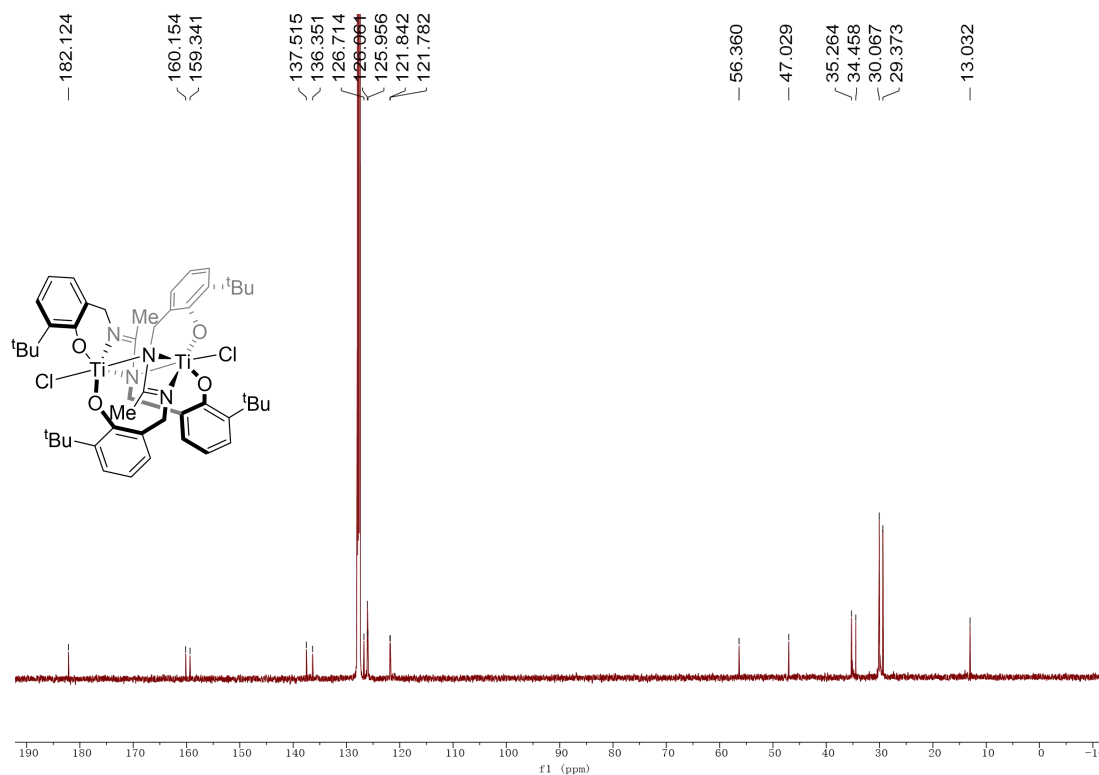

**Figure S18.**  $^1\text{H}$  NMR spectrum of complex **5-Zr** in  $\text{C}_6\text{D}_6$ .

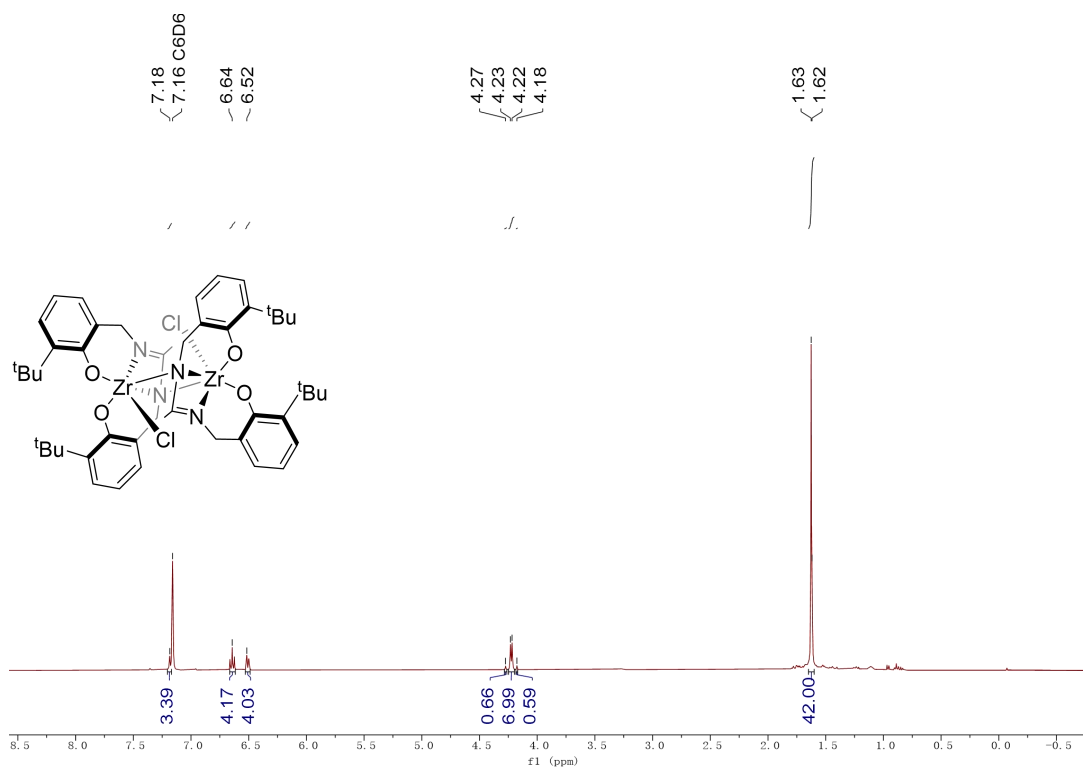

**Figure S19.**  $^{13}\text{C}$  NMR spectrum of complex **5-Zr** in  $\text{CDCl}_3$ .

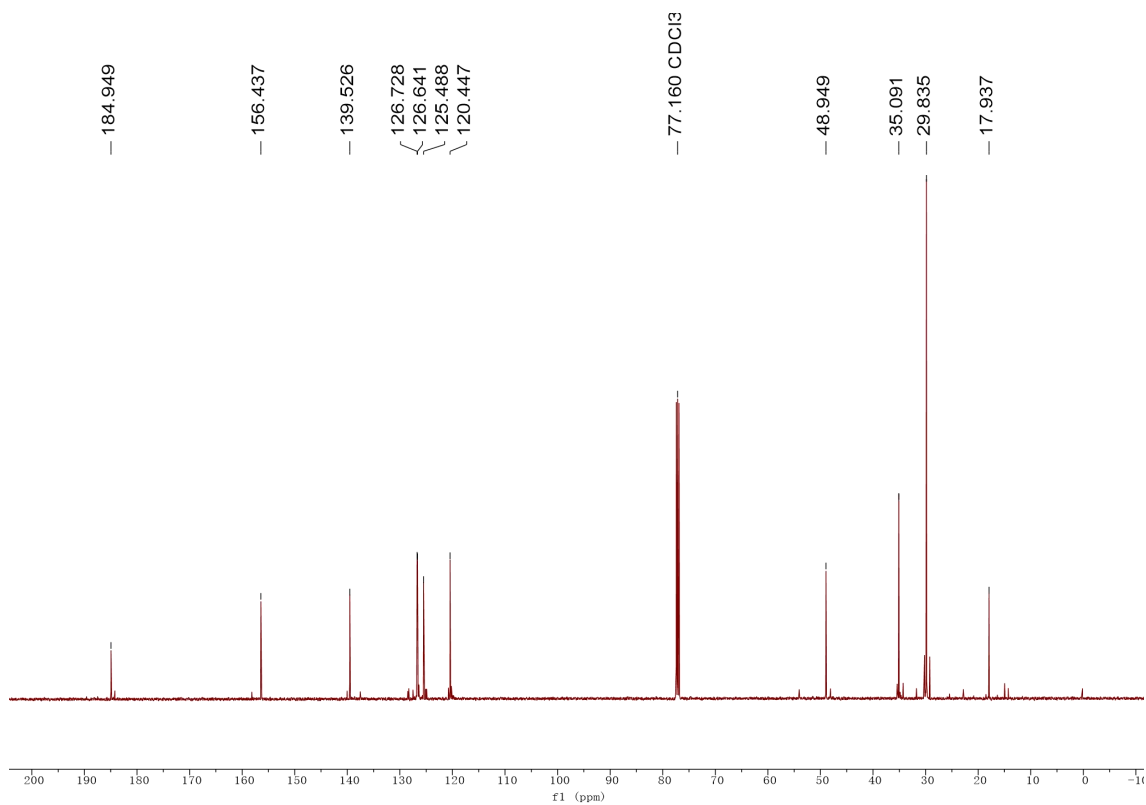

Figure S20.  $^1\text{H}$  NMR spectrum of complex **5-Hf** in  $\text{C}_6\text{D}_6$ .

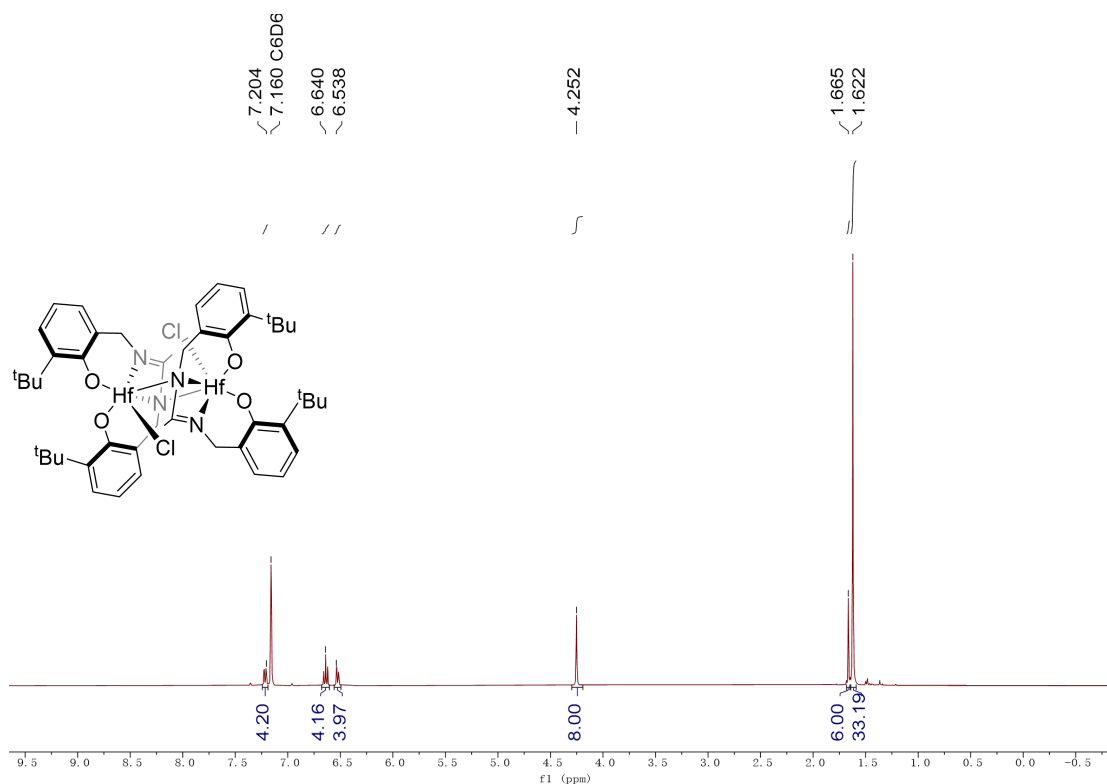

Figure S21.  $^{13}\text{C}$  NMR spectrum of complex **5-Hf** in  $\text{C}_6\text{D}_6$ .

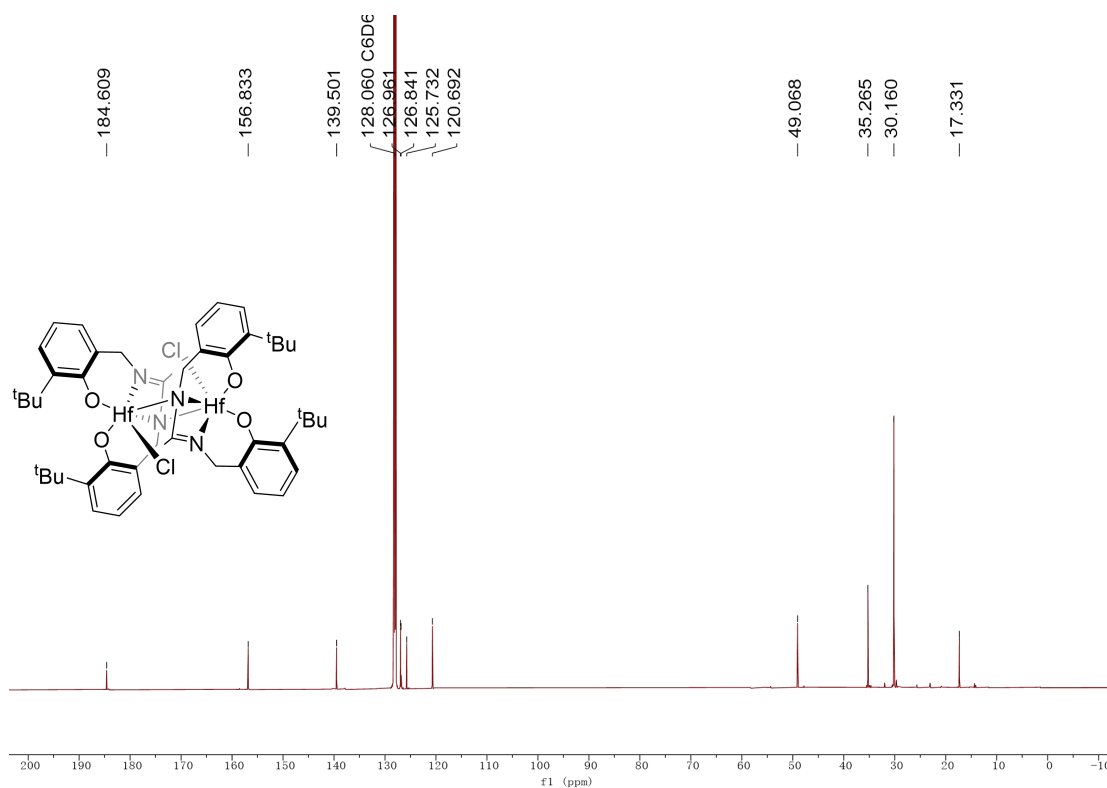

Figure S22.  $^1\text{H}$  NMR spectrum of complex **6** in  $\text{THF-d}_8$ .

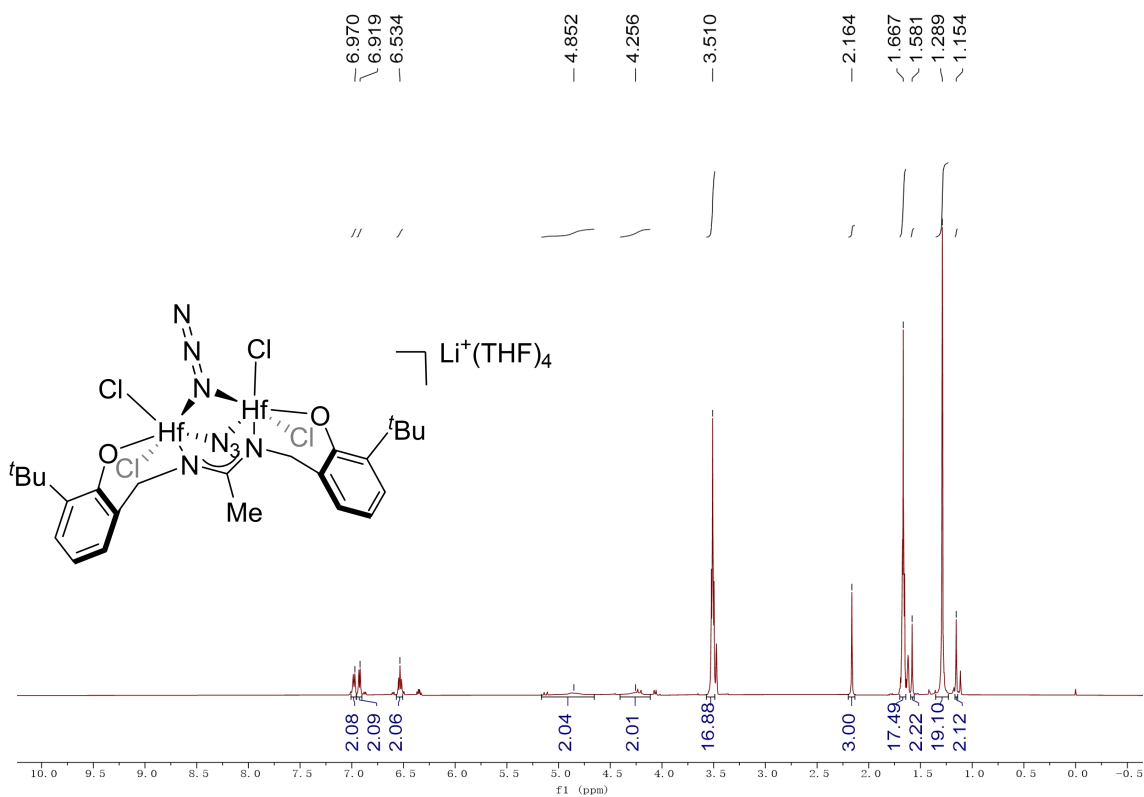

Figure S23.  $^1\text{H}$  NMR spectrum of complex **6** in  $\text{CDCl}_3$ .

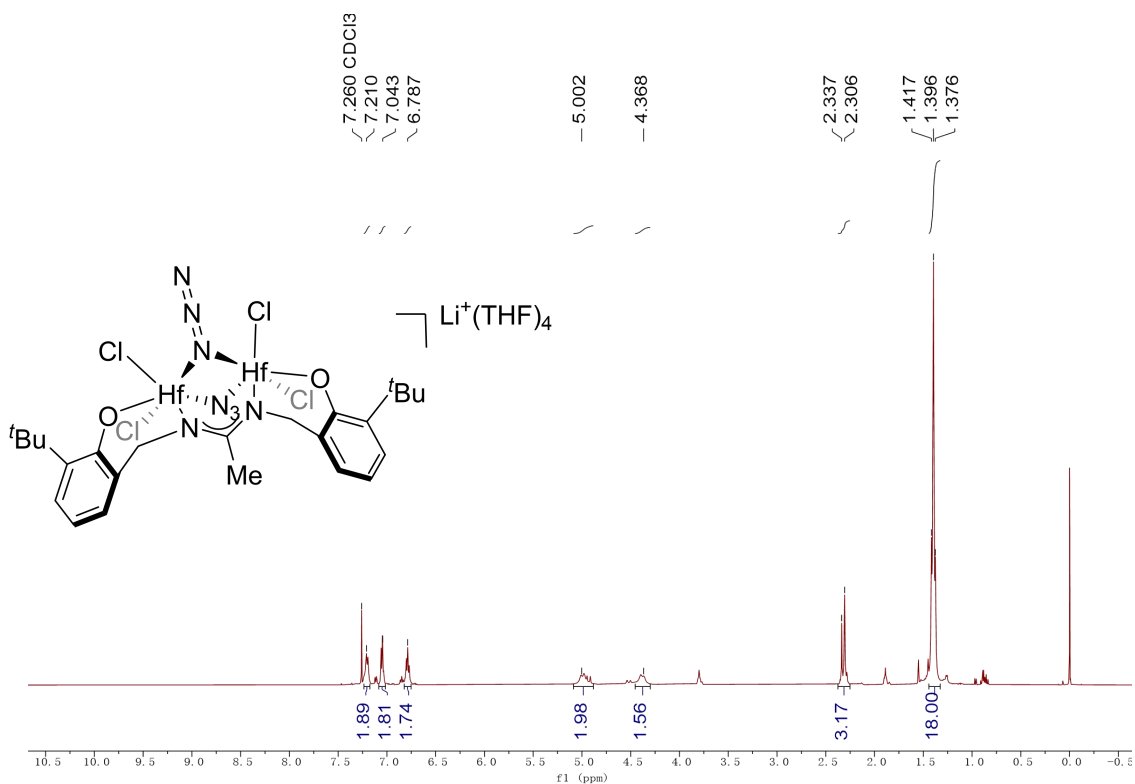



Figure S24.  $^{13}\text{C}$  NMR spectrum of complex **6** in  $\text{CDCl}_3$ .

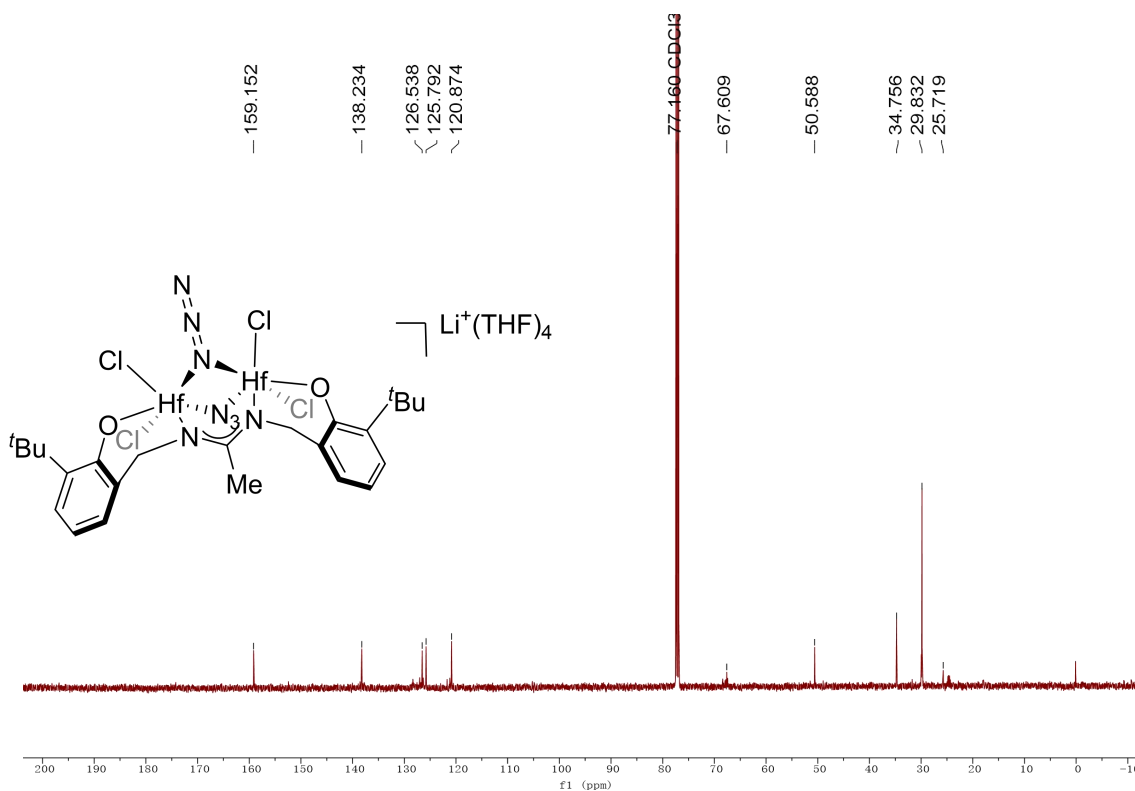

Figure S25. HSQC spectrum of complex **6** in  $\text{CDCl}_3$ .

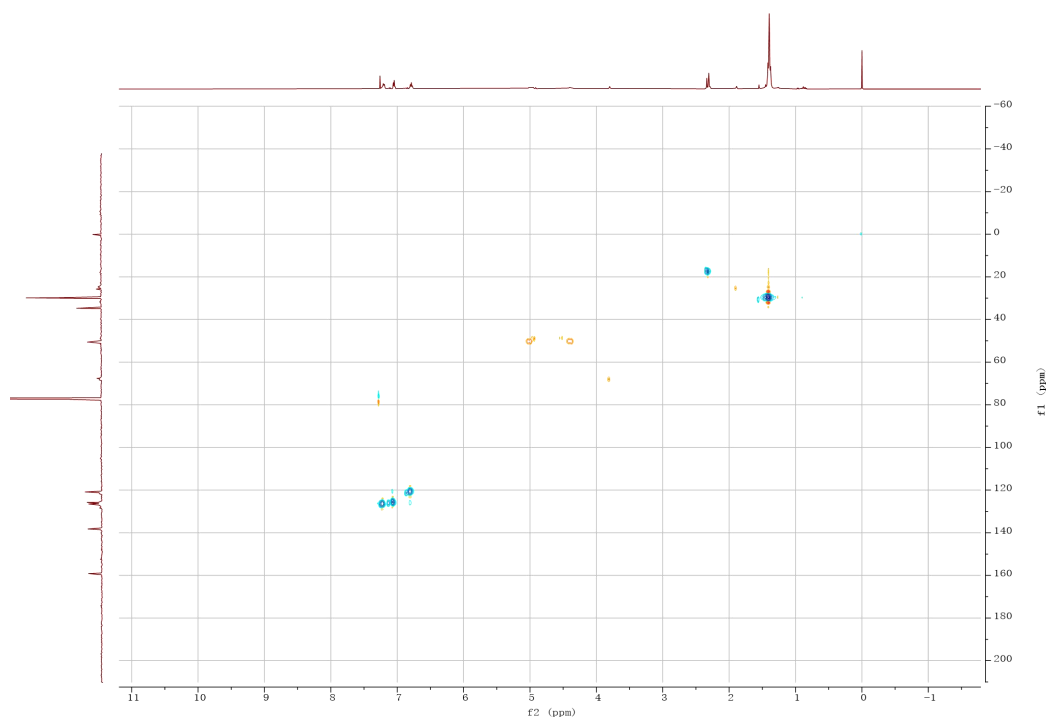

**Figure S26.** HSBC spectrum of complex **6** in CDCl<sub>3</sub>.

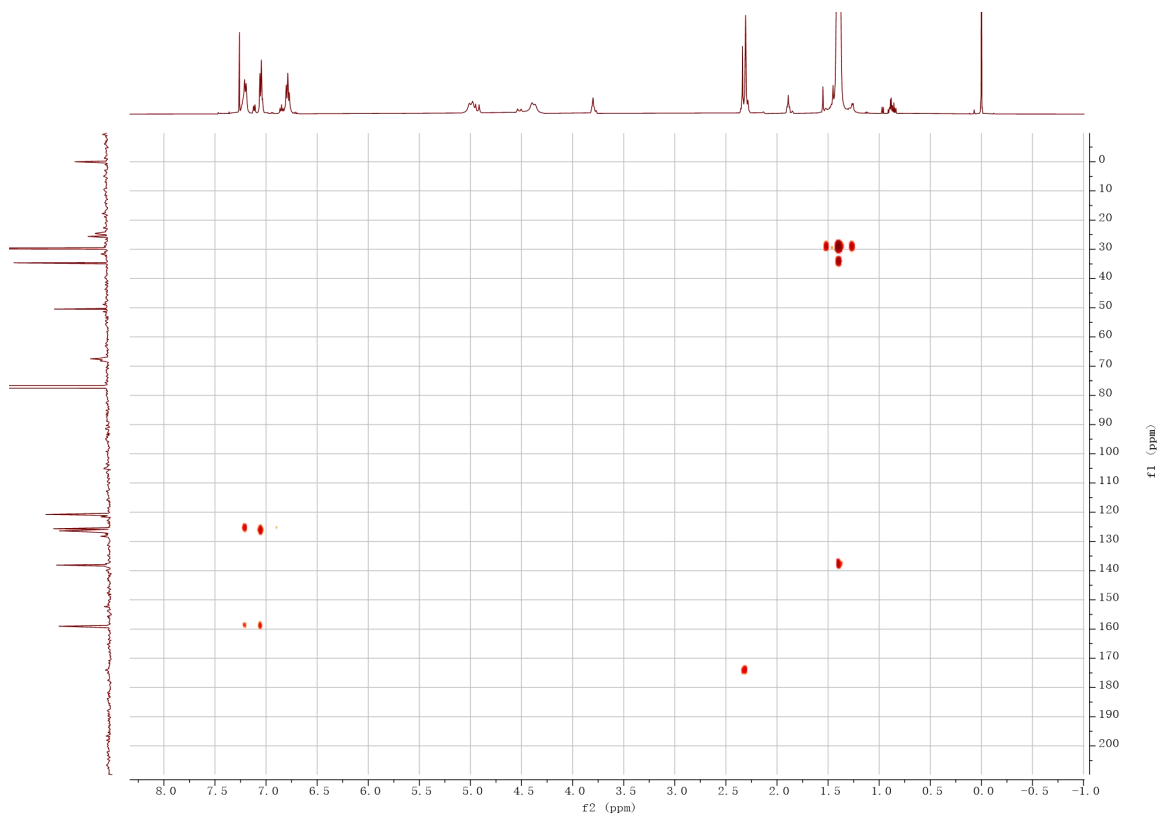

## IR spectra

Figure S27. IR spectrum of 4-TMEDA.

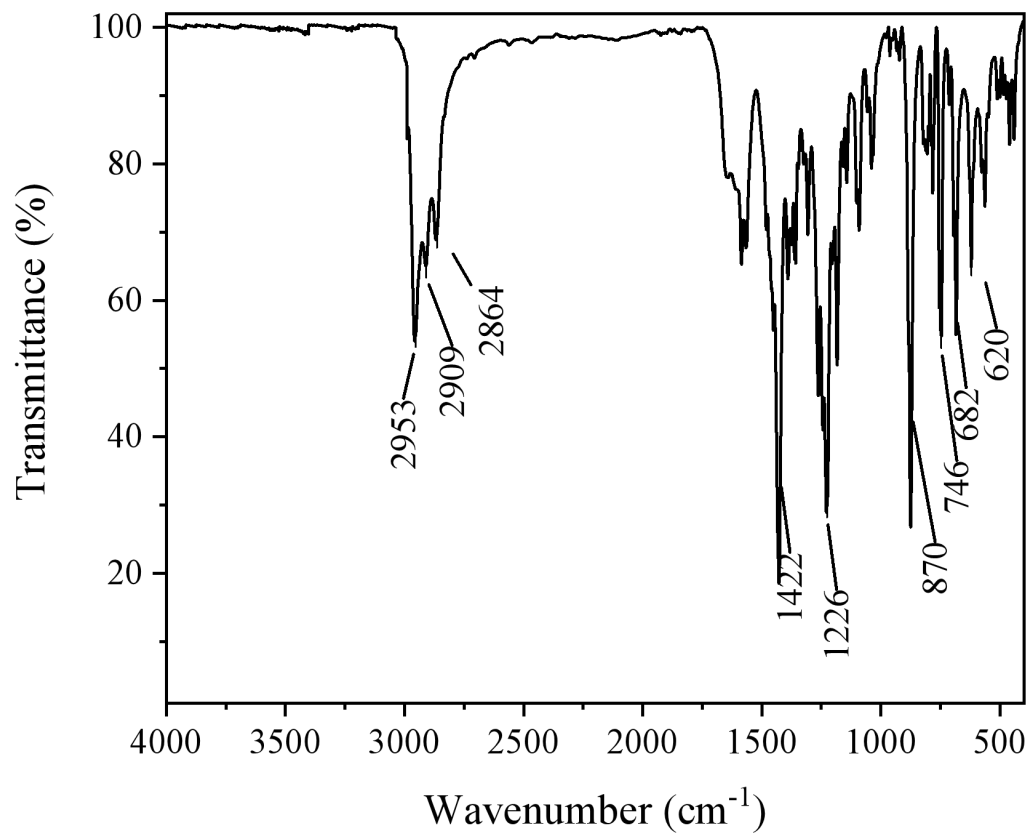

Figure S28. IR spectrum of 5-Ti.

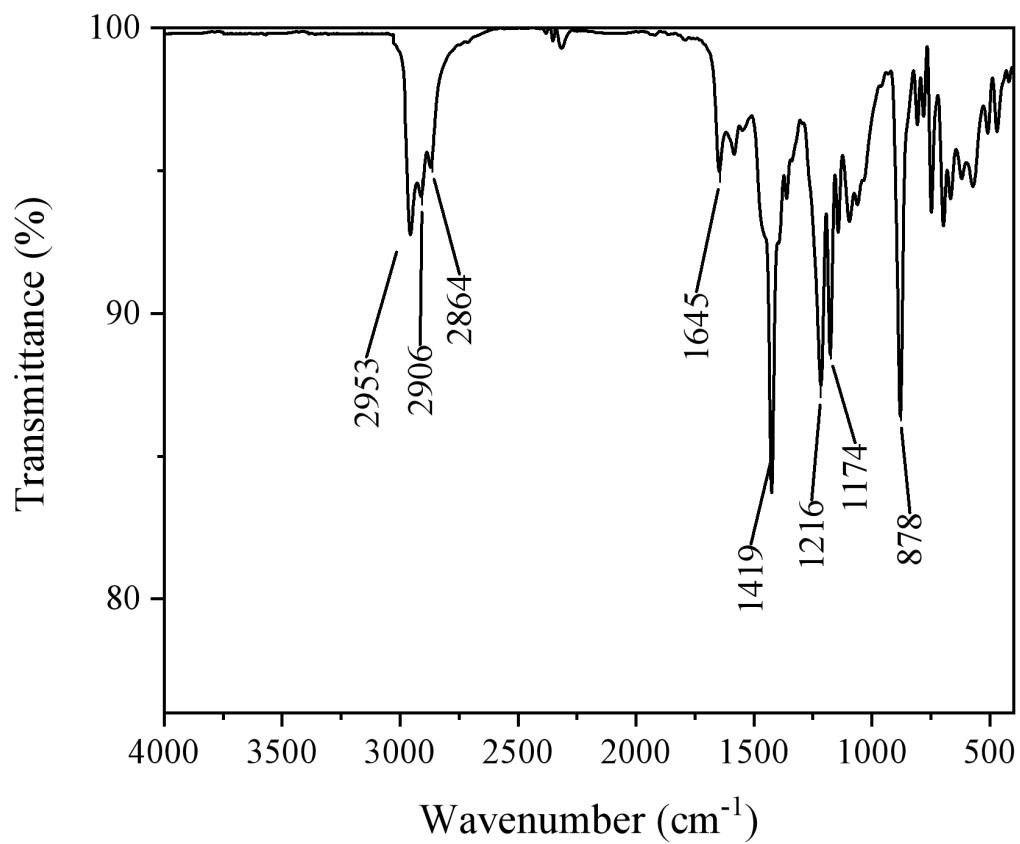

Figure S29. IR spectrum of 5-Zr.

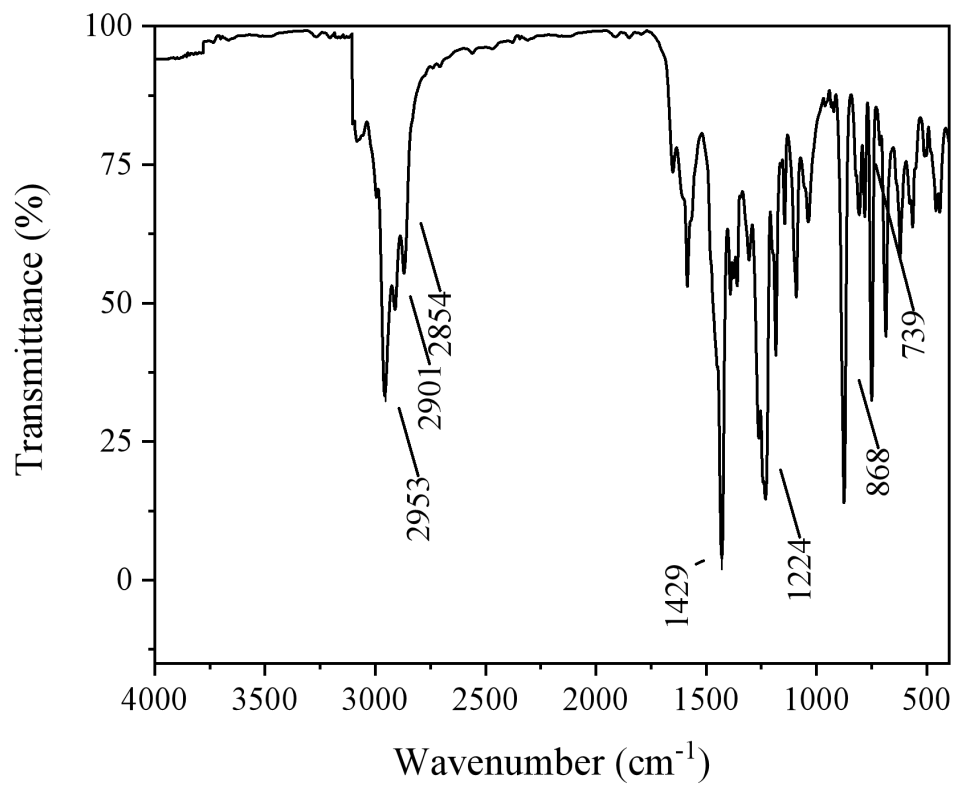

Figure S30. IR spectrum of 5-Hf.

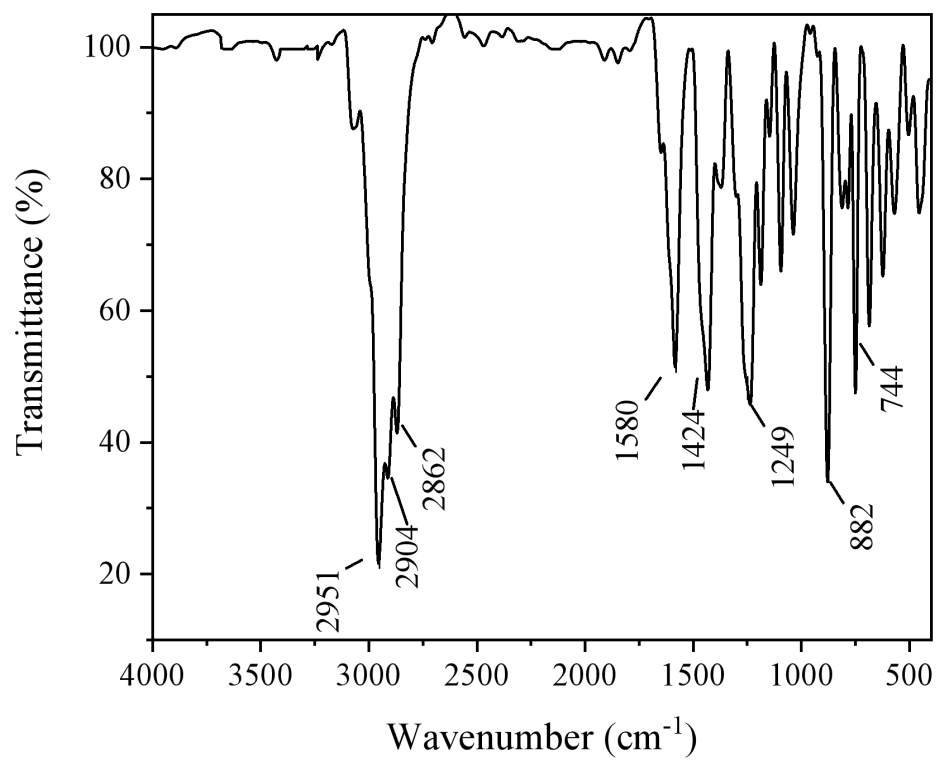

Figure S31. IR spectrum of 6.

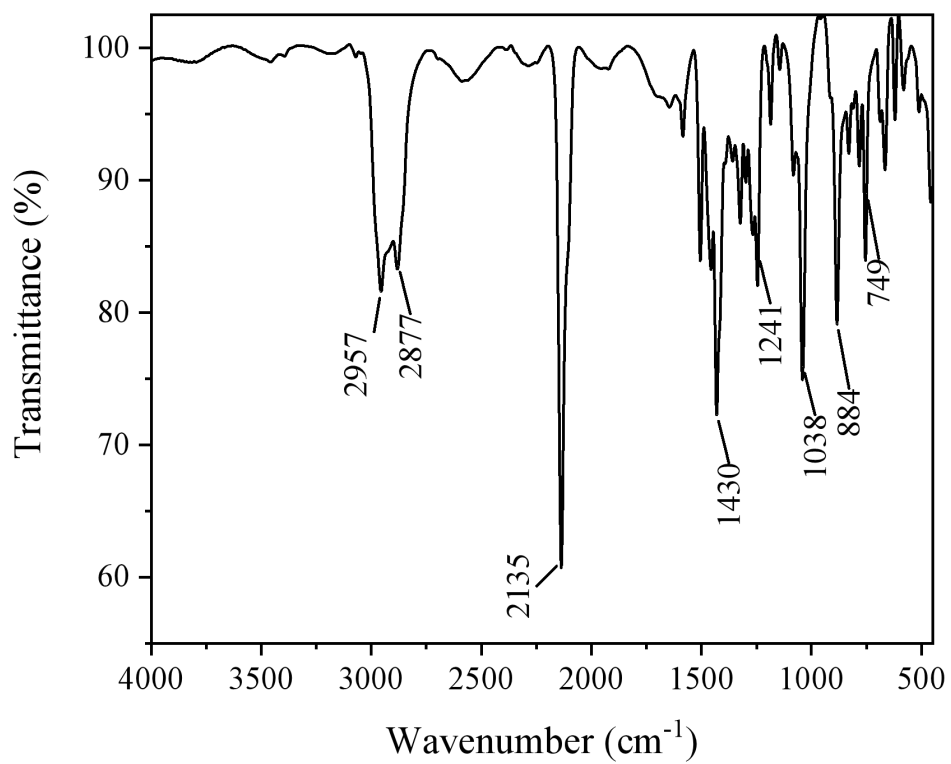

## References

- [S1] O. V. Dolomanov, L. J. Bourhis, R. J. Gildea, J. A. K. Howard, H. Puschmann, *J. Appl. Cryst.* **2009**, *42*, 339-341.
- [S2] Forder, T. R.; Jones, M. D. Synthesis and Characterisation of Aluminium(III) Imine Bis(phenolate) Complexes with Application for the Polymerisation of Rac-LA. *New J. Chem.* **2015**, *39*, 1974-1978.
- [S3] Dulong, F.; Thuéry, P.; Ephritikhine, M.; Cantat, T. Synthesis of N-Aryloxy- $\beta$ -diketiminato Ligands and Coordination to Zirconium, Ytterbium, Thorium, and Uranium. *Organometallics* **2013**, *32*, 1328-1340.
- [S4] Mayo, M. S.; Yu, X.; Zhou, X.; Feng, X.; Yamamoto, Y.; Bao, M. Synthesis of Benzoxazoles from 2-Aminophenols and  $\beta$ -Diketones Using a Combined Catalyst of Brønsted Acid and Copper Iodide. *J. Org. Chem.* **2014**, *79*, 6310-6314.
